# Supplementary material
Source: publisher figshare collection journal article supplement (https://sage.figshare.com/ndownloader/files/22247025)

**Supplementary Table 1** Baseline clinical and laboratory characteristics of the patients with SLE (*n* = 73)

| Characteristics                                               | Number of cases (%) or median values (range) |
|---------------------------------------------------------------|----------------------------------------------|
| Gender, women/men                                             | 68 (93%)/5 (7%)                              |
| Age, years                                                    | 35 (16 to 71)                                |
| Age at SLE diagnosis, years                                   | 27 (11 to 71)                                |
| Disease duration of SLE, years                                | 1 (0 to 28)                                  |
| Positive anti-nuclear antibody                                | 66 (96%)                                     |
| Positive anti-dsDNA antibody                                  | 49 (67%)                                     |
| Positive anti-Sm antibody                                     | 22 (36%)                                     |
| Positive anti-U1-RNP antibody                                 | 33 (55%)                                     |
| Positive antiphospholipid antibody                            | 23 (32%)                                     |
| SLEDAI-2K score                                               | 12 (0 to 31)                                 |
| Clinical SLEDAI-2K score                                      | 8 (0 to 27)                                  |
| History of lupus nephritis                                    | 42 (58%)                                     |
| Lupus nephritis pathological classification*<br>[II/III/IV/V] | 3/13/11/9                                    |
| History of CNS lupus                                          | 3 (4%)                                       |

SLE: systemic lupus erythematosus; anti-dsDNA: anti-double-stranded DNA; U1-RNP:

U1-ribonucleoprotein; SLEDAI-2K: SLE Disease Activity Index 2000; CNS: central nervous system.

\*According to the International Society of Nephrology/Renal Pathology Society classification.

Supplementary Figure 1

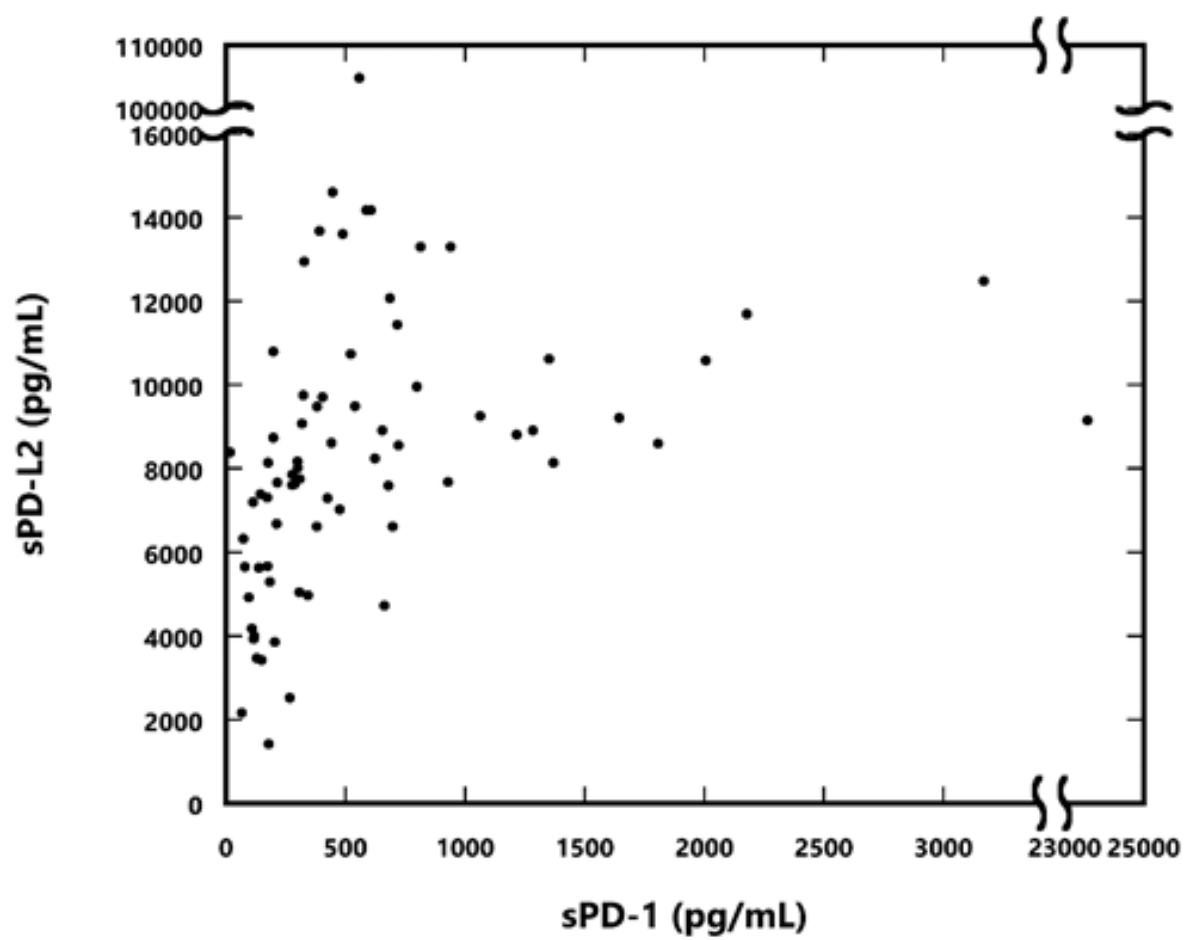

Supplement: Supplementary file 1 [file 22247025]
